# Supplementary material for: Turn-timing in conversations between autistic adults: Typical short-gap transitions are preferred, but not achieved instantly
Source: PubMed Central journal article supplement (PMC10079028; doi:10.1371/journal.pone.0284029), 2023-04-06
Supplement: pone.0284029.s001.pdf [file pone.0284029.s001.pdf]

**S1 Table. Summary of dialogue duration, number of IPU's and transition types, by group.**

| Group | Mean dialogue duration (SD) | Total IPU's | Total turn transitions | Total silent gaps (% of all transitions) | Total between-overlaps (% of all transitions) | Total within-overlaps (% of all transitions) |
|-------|-----------------------------|-------------|------------------------|------------------------------------------|-----------------------------------------------|----------------------------------------------|
| ASD   | 14' 37''<br>(7' 12'')       | 6211        | 1841                   | 1168<br>(63.4 %)                         | 388<br>(21.1 %)                               | 285<br>(15.5 %)                              |
| CTR   | 26' 01''<br>(14' 35'')      | 12121       | 3827                   | 2250<br>(58.8 %)                         | 938<br>(24.5 %)                               | 639<br>(16.7 %)                              |
| Total | 20' 19''<br>(12' 32'')      | 18332       | 5668                   | 3418 (60.3 %)                            | 1326 (23.4 %)                                 | 924 (16.3 %)                                 |
